# Supplementary material
Source: PubMed Central journal article supplement (PMC6393607)
Supplement: supp_RA118.006546_141726_1_supp_255377_pk399j.pdf [file supp_RA118.006546_141726_1_supp_255377_pk399j.pdf]

## Supporting Information

SI Table 1

### Bacterial strains used in this study

| Strain number | Name                                        | Description                                                                                                          |
|---------------|---------------------------------------------|----------------------------------------------------------------------------------------------------------------------|
| M006          | CGA009                                      | The wild type <i>R. palustris</i> strain used for this study                                                         |
| M039          | $\Delta RPA0376$                            | CGA009 strain deleted of <i>rpa0376</i>                                                                              |
| M041          | $\Delta RPA2580$                            | CGA009 strain deleted of <i>rpa2580</i>                                                                              |
| M043          | $\Delta RPA2838$                            | CGA009 strain deleted of <i>rpa2838</i>                                                                              |
| M045          | $\Delta RPA2838$ - <i>RPA2580</i>           | CGA009 strain deleted of <i>rpa2838</i> and <i>rpa2580</i>                                                           |
| M046          | $\Delta RPA20376$ - <i>RPA2580</i>          | CGA009 strain deleted of <i>rpa0376</i> and <i>rpa2580</i>                                                           |
| M047          | $\Delta RPA0376$ - <i>RPA2838</i>           | CGA009 strain deleted of <i>rpa0376</i> and <i>rpa2838</i>                                                           |
| M053          | $\Delta TRI$ - <i>PIMT</i>                  | CGA009 strain deleted of <i>rpa0376</i> , <i>rpa2580</i> and <i>rpa2838</i>                                          |
| M079          | <i>pBBP-His-RPA2580</i>                     | A construct of His-tagged RPA2580 was cloned into pBBPgdh plasmid with the native ribosomal binding site of RPA2580. |
| M080          | $\Delta RPA2580$ :: <i>pBBP-His-RPA2580</i> | The strain $\Delta RPA2580$ harboring the plasmid <i>pBBP-His-RPA2580</i>                                            |

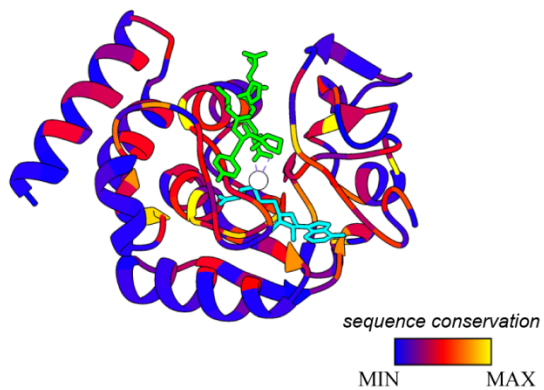

**SI Figure 1.**

A structural model of RPA0376 is colored based on its amino acid conservation with known PIMT sequences. The SAH is shown in cyan and the peptide VYP-*iso*D-HA is shown in green. The white sphere represents the location of the methyl group that is transferred.

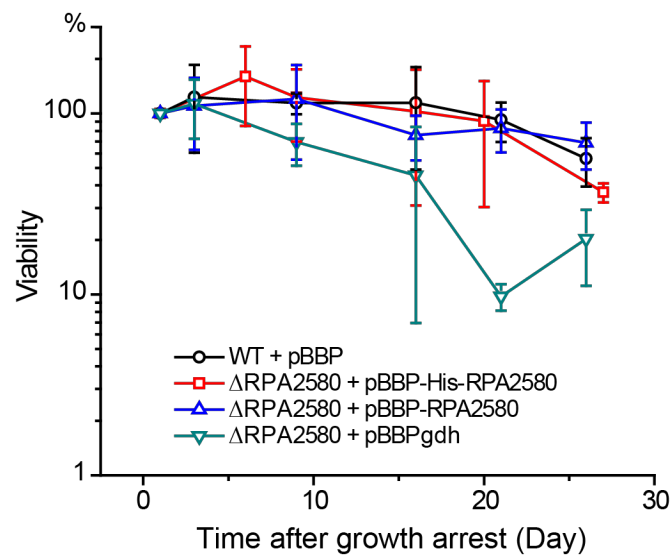

SI Figure 2.

The compromised longevity of a *rpa2580* deletion mutant is complemented by expressing His-tagged RPA2580 *in trans*.

Functional divergence of bacterial PIMTs

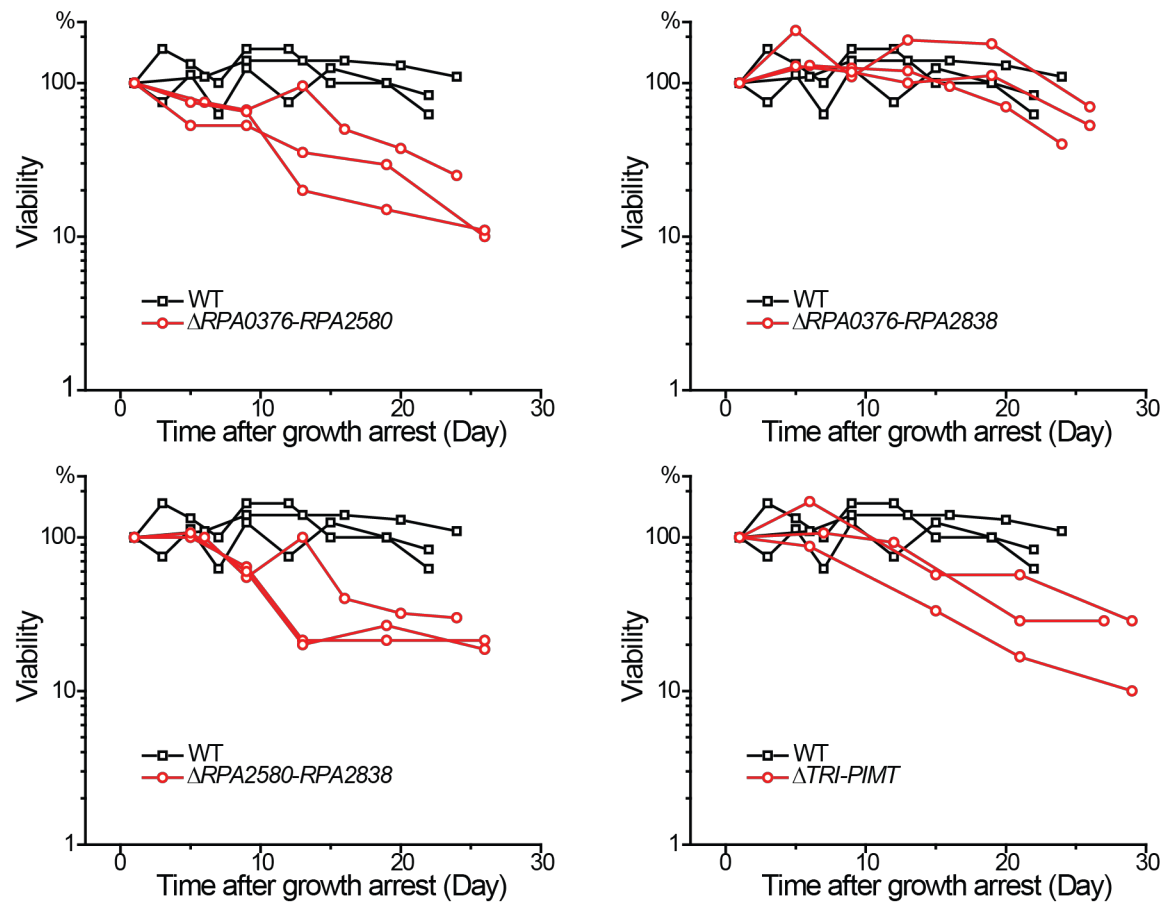

SI Figure 3.

Survival of growth-arrested cells of different *R. palustris* mutants. The data for the wild-type strain are from our previous study. A *rpa0376* and *rpa2838* double deletion mutant had a wild type longevity phenotype.

## Functional divergence of bacterial PIMTs

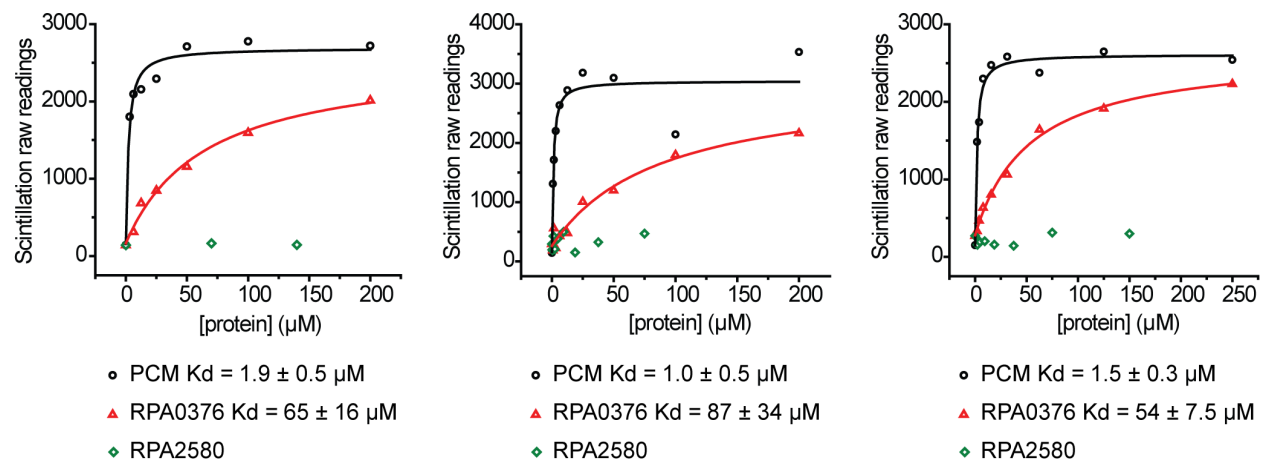

### SI Figure 4.

SAM binding of *R. palustris* and *E. coli* PIMTs. Serial dilutions of tested proteins were incubated with  $0.5 \mu\text{M}$   $^{14}\text{C}$ -SAM at  $30^\circ\text{C}$  for one h and then the bound SAM was measured. The data were fitted to a one-to-one binding model and the  $K_d$ s were calculated for three different sets of serial dilutions.

Functional divergence of bacterial PIMTs

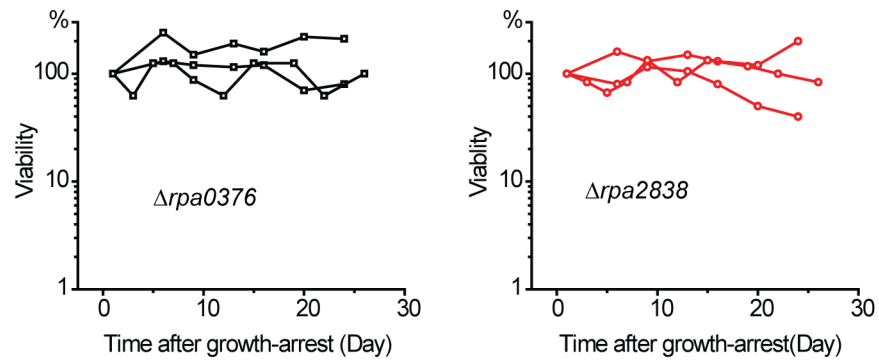

SI Figure 5.

Survival of growth-arrested cells of different *R. palustris* mutants. The strain deleted of either *rpa0376* or *rpa2838* had a wild type longevity phenotype.
